# Supplementary material for: Recombinant Oxidase from Armillaria tabescens as a Potential Tool for Aflatoxin B1 Degradation in Contaminated Cereal Grain
Source: MDPI journal article supplement (doi:10.3390/toxins15120678), 2023-11-30
Supplement: s1 [file s1]

Supplementary Materials: Recombinant oxidase from *Armil-*  
*laria tabescens* as a potential tool for aflatoxin B1 degradation  
in contaminated cereal grain

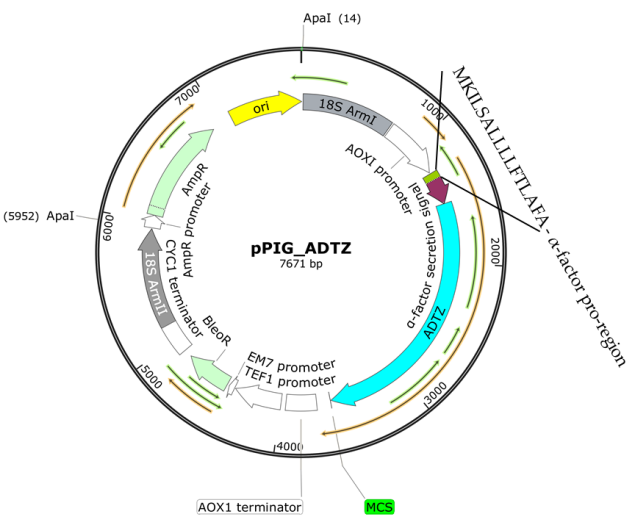

Figure S1. Map of the pPIGa-1-AFO plasmid

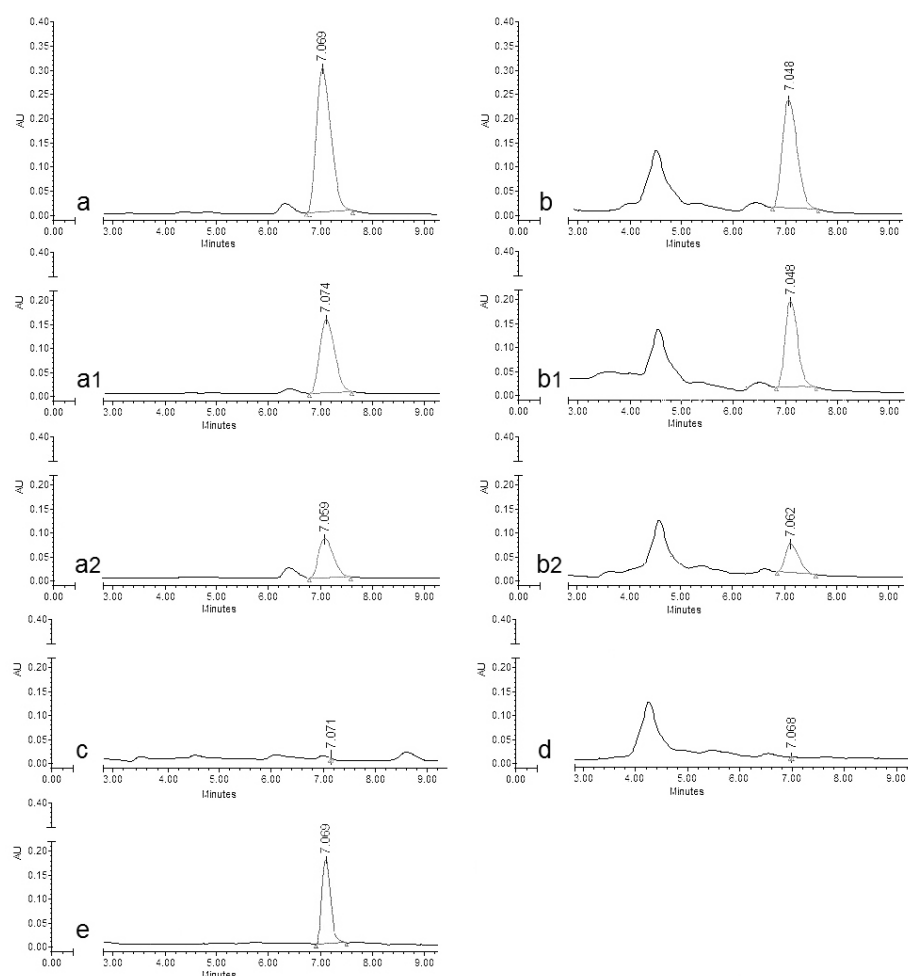

**Figure S2.** Chromatograms illustrating reduction of AFB1 content in extracts of wheat (**a1**, **a2**) and corn (**b1**, **b2**) grain inoculated with a toxigenic *A. flavus* (**a**, **b**) resulted from 24- (**a1**, **b1**) and 48-hour (**a2**, **b2**) grain exposure to recombinant AFO at pH 6.0 and 30°C. Chromatograms (**c**) and (**d**) show results of HPLC-analyses of extracts non-inoculated wheat and corn grain, respectively, as well as commercial AFB1 standard (**e**) under the same conditions.

6  
7  
8  
9  
10
